# Supplementary material for: Sequential controlled-released dual-drug loaded scaffold for guided bone regeneration in a rat fenestration defect model
Source: Royal Society of Chemistry journal article supplement (doi:10.1039/c7tb00909g), 2017-01-01
Supplement: c7tb00909g1.pdf [file c7tb00909g1.pdf]

## Supplementary Information for

### Sequential controlled-released dual-drug loaded scaffold for guided bone regeneration in a rat fenestration defect model

Zhenzhao Guo<sup>a,b</sup>, Dongying Bo<sup>a</sup>, Ping He<sup>a</sup>, Hong Li<sup>a, \*</sup>, Gang Wu<sup>c</sup>, Zhizhong Li<sup>b</sup>, Changren Zhou<sup>a</sup>, Qiyuan Li<sup>d, \*</sup>

a. Department of Materials Science and Engineering, Jinan University, Guangzhou, China.

b. The First Affiliated Hospital of Jinan University, Guangzhou, China.

c. School of Materials Science and Engineering, South China University of Technology, Guangzhou, China.

d. Affiliated Hospital of Kunming University of Science and Technology, Kunming, China.

\* Corresponding author: [tlihong@jnu.edu.cn](mailto:tlihong@jnu.edu.cn); [ynliqiyuan@aliyun.com](mailto:ynliqiyuan@aliyun.com)

#### Table of content:

#### Supplementary information(SI)

Figure S1. FT-IR spectra of pure PLLA (a), DDDS(b) and CSMs (c)

Figure S2. Chitosan microsphere size distribution

Table S1. Release kinetic parameters calculated from the drug release data by different mathematical models

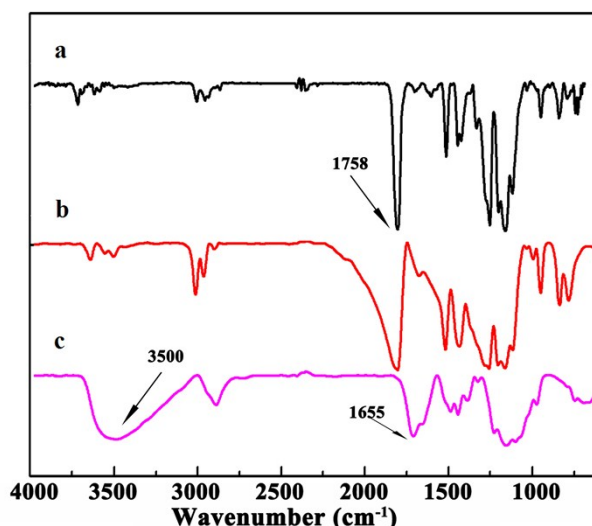

Figure S1. FT-IR spectra of pure PLLA (a), DDDS(b) and CSMs (c)

Figure S1b shows the distinct FTIR spectra of the DDDS from the pure PLLA and CSMs (Figure S1a and S1c, respectively). The amino band of 1655  $\text{cm}^{-1}$  in the CSM shifted to 1650  $\text{cm}^{-1}$  in the DDDS, while an original strong band of the PLLA component at 1758  $\text{cm}^{-1}$  for the ester group becomes significantly weaker and markedly wider. The intensity of the stretching bands overlapped and centered near 3500  $\text{cm}^{-1}$  for the hydroxyl and amino groups pronouncedly decreases. All of these events indicated that there were obvious interactions among the amino, carboxyl, and hydroxyl groups of PLLA and chitosan. Similar results were also previously reported by Chen et al.<sup>1</sup> and Niu et al.<sup>2</sup>.

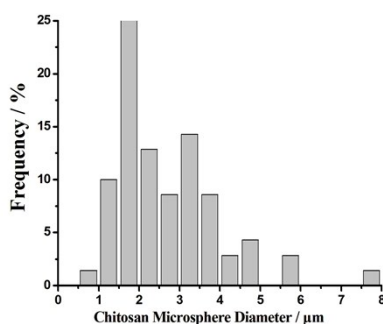

Figure S2. Chitosan microsphere size distribution

The chitosan microspheres size distribution is shown in Figure S2. As could be seen from the results, the CSMs particle size is in the range of 2-8  $\mu\text{m}$ . Moreover, the average diameter of microspheres is 2.65  $\mu\text{m}$ .

To study the kinetic mechanism of drug release, four models were fitted: zero order, first order, Higuchi's model and Korsmeyer-Peppas model.<sup>3</sup> These models are given in the following equations:

$$\text{Zero order: } Q_t = Q_0 + K_0 t$$

$$\text{First order: } \ln Q_t = \ln Q_0 + K_1 t$$

$$\text{Higuchi's model: } Q_t = K_H \sqrt{t}$$

$$\text{Korsmeyer - Peppas model: } M_t / M_\infty = kt^n$$

where  $Q_0$  is the initial amount of drug in solution (it is usually zero) and  $Q_t$  is the amount of drug released in time  $t$ ;  $K_0$ ,  $K_1$  and  $K_H$  are the zero-order, the first-order release constant and the Higuchi dissolution constant respectively, and  $M_t/M_\infty$  is the fraction of drug released at time  $t$ .  $k$  is the rate constant, and  $n$  is the release exponent of the Korsmeyer-Peppas model.

The release kinetics parameters for the four formulations based on the *in vitro* release profiles are presented in Table S1. It could be observed that the *in vitro* release of both drugs followed the Korsmeyer-Peppas release kinetic model with a highest value of  $R^2$  (correlation coefficient) value. Moreover, the  $n$  (release exponents) were found to be between 0.16 (for NRG from NRG-PTL-PLLA) and 0.44 (for NRG from DDDS), respectively.

Table S1 Release kinetic parameters calculated from the drug release data by different mathematical models ( $R^2$ =correlation coefficient;  $n$ = release exponent, indicative of the type of transport).

| sample | Zero order<br>$R^2$ | First order<br>$R^2$ | Higuchi's model<br>$R^2$ | Korsmeyer-Peppas |
|--------|---------------------|----------------------|--------------------------|------------------|
|--------|---------------------|----------------------|--------------------------|------------------|

|                       |       |       |       | model          |      |
|-----------------------|-------|-------|-------|----------------|------|
|                       |       |       |       | R <sup>2</sup> | n    |
| NRG from NRG-PTL-PLLA | 0.325 | 0.736 | 0.597 | 0.874          | 0.16 |
| PTL from NRG-PTL-PLLA | 0.599 | 0.814 | 0.754 | 0.943          | 0.28 |
| NRG from DDDS         | 0.817 | 0.908 | 0.969 | 0.976          | 0.44 |
| PTL from DDDS         | 0.541 | 0.798 | 0.706 | 0.917          | 0.27 |

## Reference

- [1] C. Chen, L. Dong, M. K. Cheung, *European Polymer Journal*, 2005, **41**, 958–966.  
[2] X. Niu, Q. Feng, M. Wang, X. Guo, Q. Zheng, *Polymer Degradation and Stability*, 2009, **94**, 176-182.  
[3] J. Siepmanna, N. A. Peppas, *Adv. Drug Deliver. Rev.*, 2001, 48, 139-157.
